# Supplementary material for: Formation of Aggregate-Free Gold Nanoparticles in the Cyclodextrin-Tetrachloroaurate System Follows Finke–Watzky Kinetics
Source: MDPI journal article supplement (doi:10.3390/nano12040583), 2022-02-09
Supplement: s1 [file s1]

# Formation of Aggregate-Free Gold Nanoparticles in the Cyclodextrin-Tetrachloroaurate System Follows Finke–Watzky Kinetics

Yuri Sergeyevich Pestovsky<sup>1,2,\*</sup> and Teerapol Srichana<sup>1,3,\*</sup>

<sup>1</sup> Drug Delivery System Excellence Center, Prince of Songkla University, Songkhla 90110, Thailand

<sup>2</sup> Genetic Engineering Department, Center for Research and Advanced Studies of the National Polytechnic Institute (Cinvestav), Irapuato 36824, Mexico

<sup>3</sup> Faculty of Pharmaceutical Sciences, Prince of Songkla University, Songkhla 90110, Thailand

\* Correspondence: upestovskij@gmail.com (Y.S.P.); teerapol.s@psu.ac.th (T.S.); Tel.: +66-7428-8979 (T.S.)

**Table S1.** Recommended conditions for the synthesis of aggregate-free gold nanoparticles with immobilized cyclodextrins at room temperature.

| Type     | Cyclodextrin     |       | Time,<br>min   | Centrifugation parameters |               | Average<br>particle size,<br>nm |
|----------|------------------|-------|----------------|---------------------------|---------------|---------------------------------|
|          | Concentration, M | pH    |                | Speed, g                  | Duration, min |                                 |
| $\alpha$ | 0.004            | 10.56 | 149 – 184; 768 | 7430                      | 20            | 12-13                           |
|          | 0.002            | 11.5  | 413 – 613      | 7430                      | 20            | 23-29                           |
|          | 0.004            | 11.5  | 288; 435 – 966 | 7430                      | 20            | 1; 18; 22-25                    |
| $\beta$  | 0.004            | 10.56 | 93 – 210; 1172 | 7430                      | 20            | 11.5-13                         |
|          |                  | 11    | 195 – 546      | 13200                     | 10            | 14-16                           |
|          |                  | 11.5  | 125 – 280      | 7430                      | 20            | 1; 37-42                        |

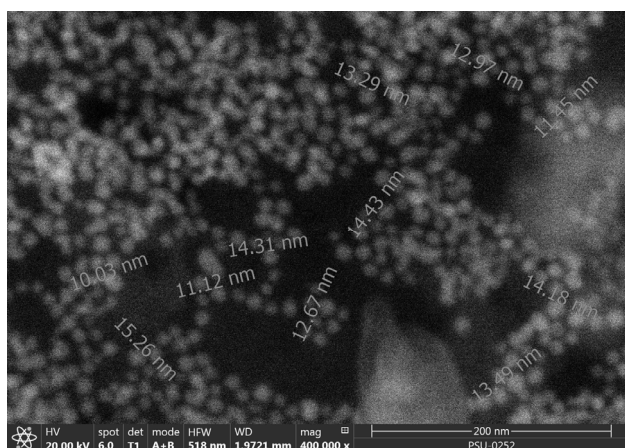

(a)

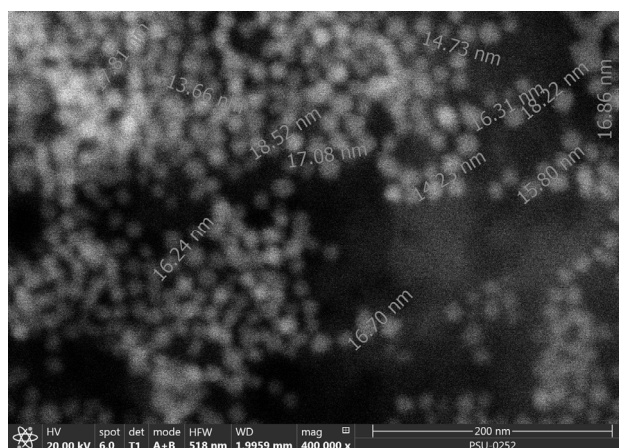

(b)

**Figure S1.** Scanning electron microscopy images of gold nanoparticles with immobilized (a)  $\alpha$ -cyclodextrin and (b)  $\gamma$ -cyclodextrin synthesized under reflux.

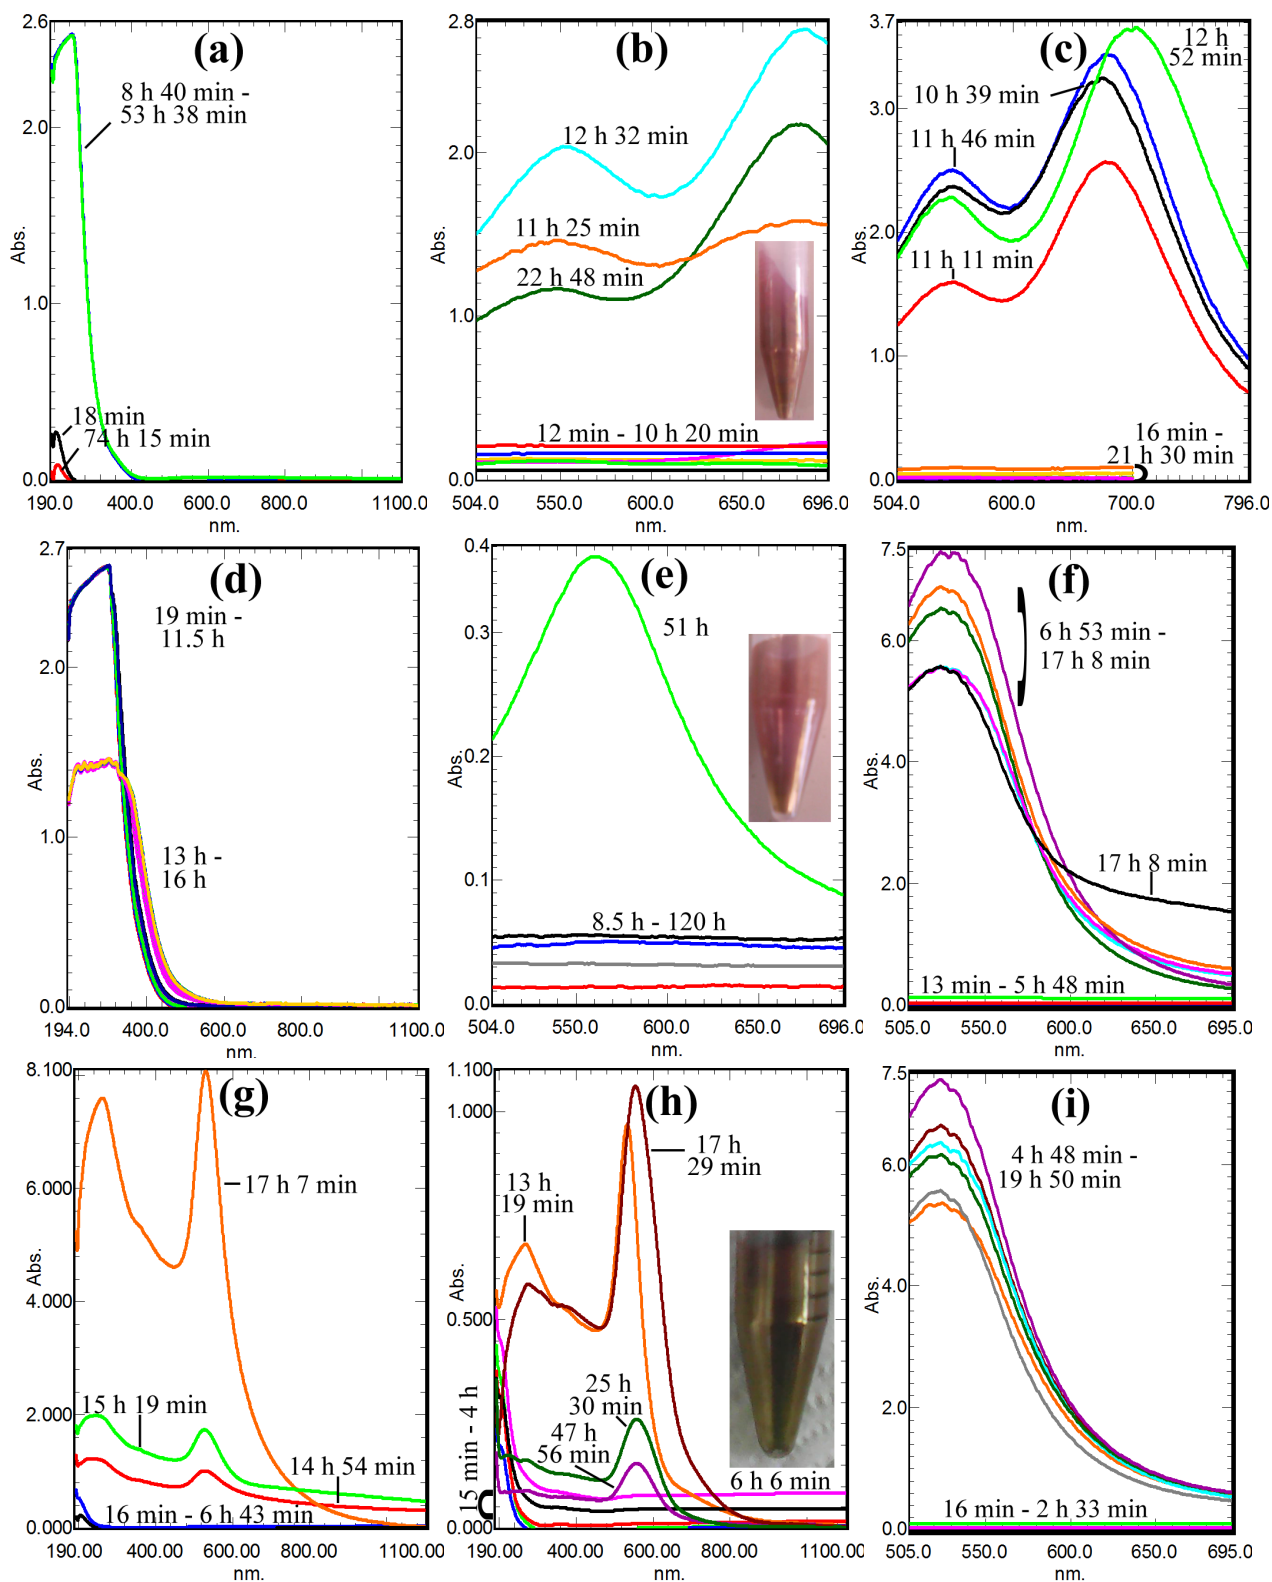

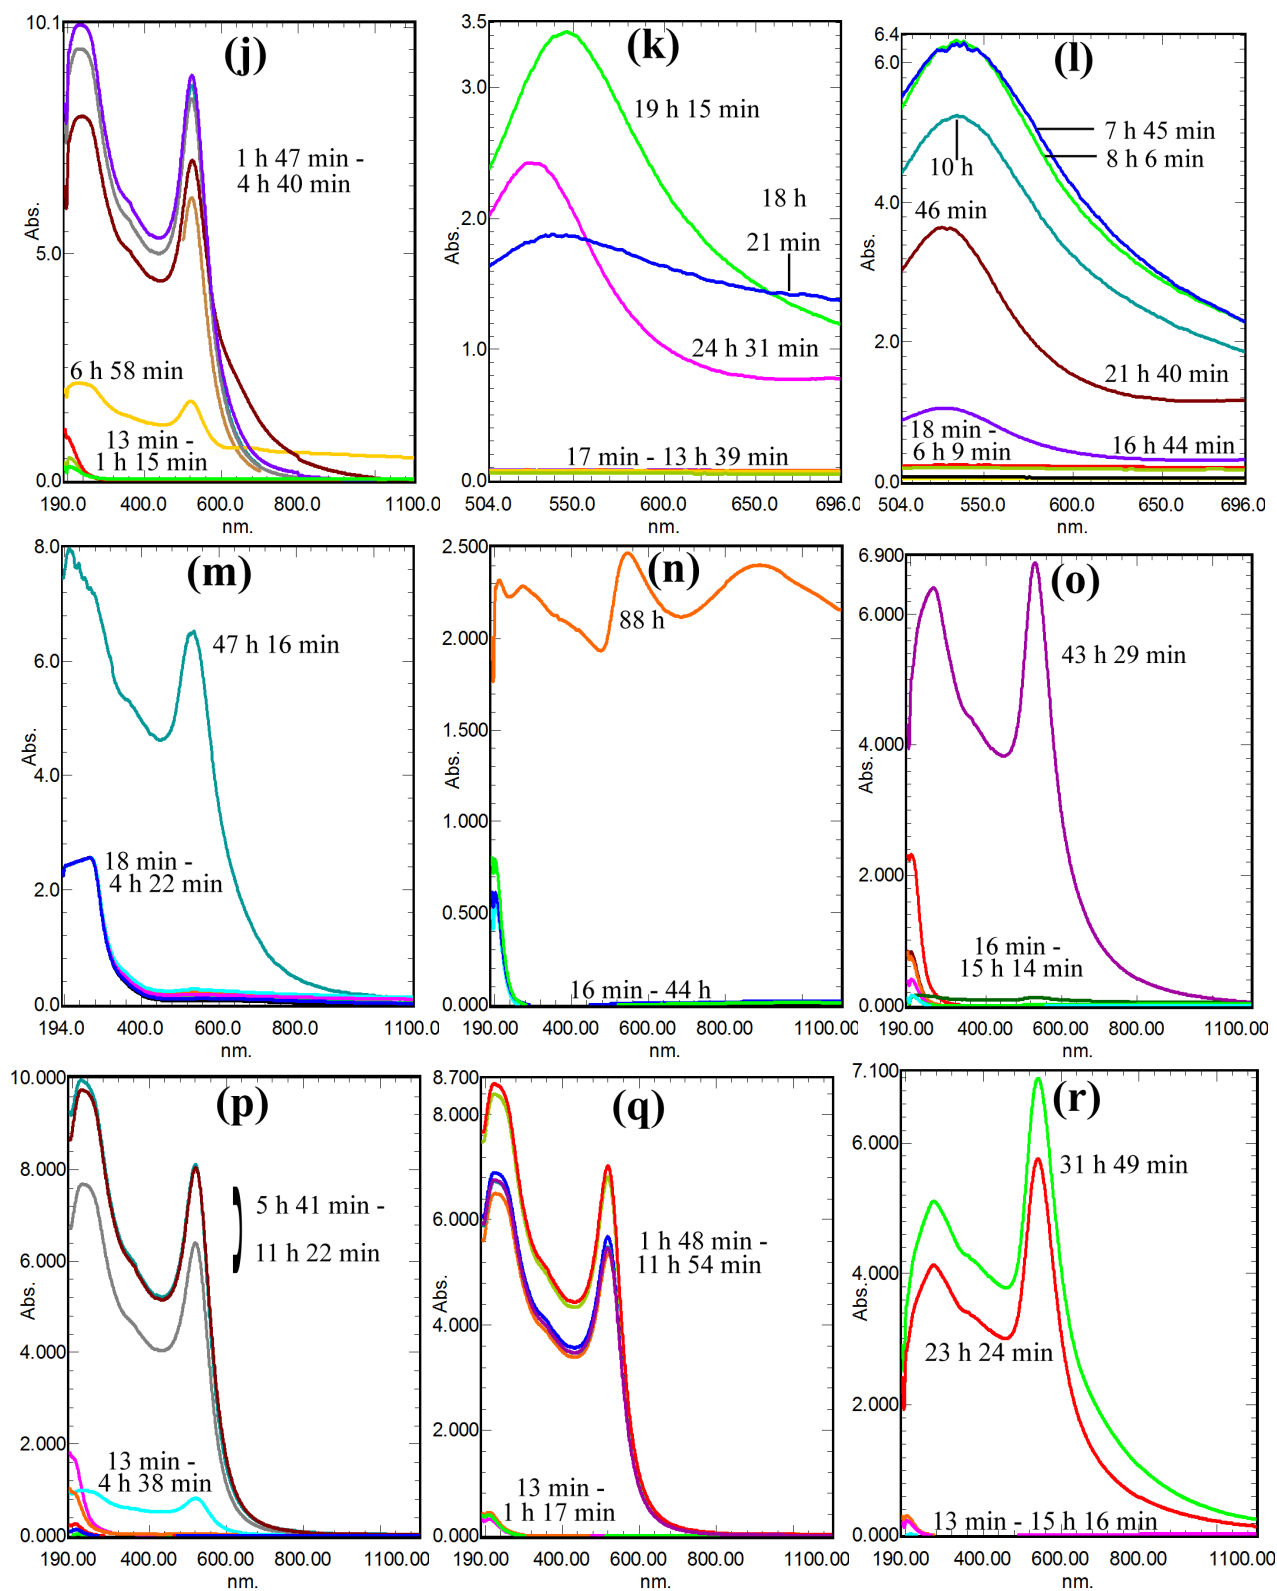

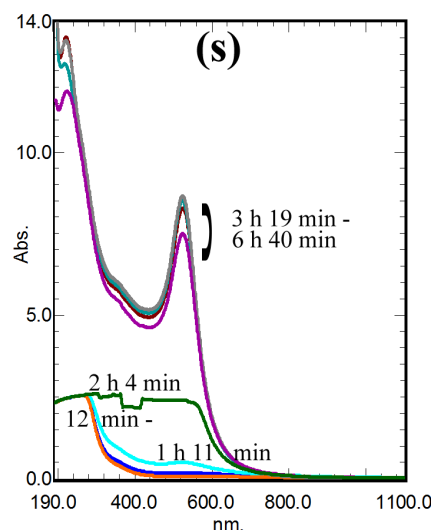

**Figure S2.** Absorbance spectra of gold nanoparticles synthesized at 0.1% (w/w)  $\text{HAuCl}_4$  at room temperature **(a)** at 0.001 M  $\gamma$ -cyclodextrin, pH 10.56; at pH 12: **(b)** at 0.004 M  $\alpha$ -cyclodextrin; **(c)** at 0.004 M  $\beta$ -cyclodextrin; **(d)** at 0.004 M  $\gamma$ -cyclodextrin; at pH 11.5: **(e)** at 0.001 M  $\alpha$ -cyclodextrin; **(f)** at 0.002 M  $\alpha$ -cyclodextrin; **(g)** at 0.002 M  $\alpha$ -cyclodextrin in the absence of HCl; **(h)** at 0.002 M  $\alpha$ -cyclodextrin in the presence of NaCl; **(i)** at 0.004 M  $\alpha$ -cyclodextrin; **(j)** at 0.004 M  $\beta$ -cyclodextrin; **(k)** at 0.001 M  $\gamma$ -cyclodextrin; **(l)** at 0.002 M  $\gamma$ -cyclodextrin; **(m)** at 0.004 M  $\gamma$ -cyclodextrin; at pH 11: **(n)** at 0.001 M  $\alpha$ -cyclodextrin; **(o)** at 0.002 M  $\alpha$ -cyclodextrin; **(p)** at 0.004 M  $\alpha$ -cyclodextrin; **(q)** at 0.004 M  $\beta$ -cyclodextrin; **(r)** at 0.002 M  $\gamma$ -cyclodextrin; **(s)** at 0.004 M  $\gamma$ -cyclodextrin. The respective 'golden mirrors' are shown as insets.

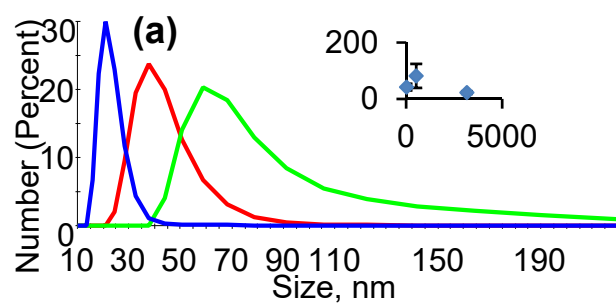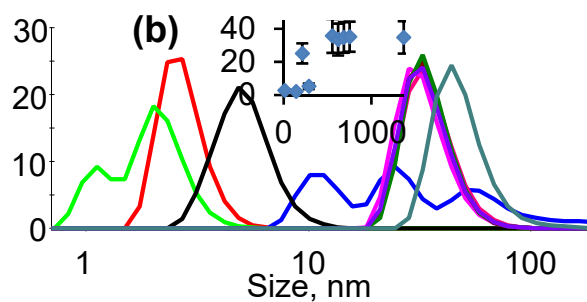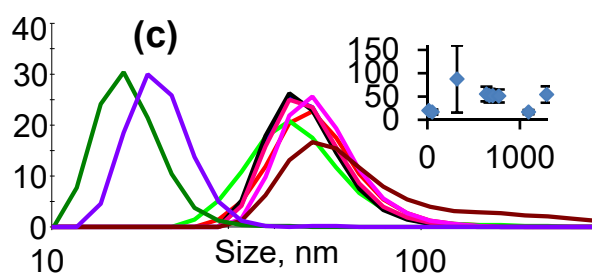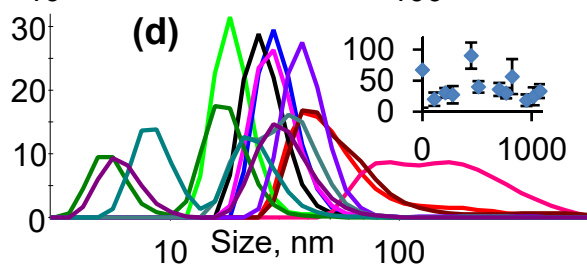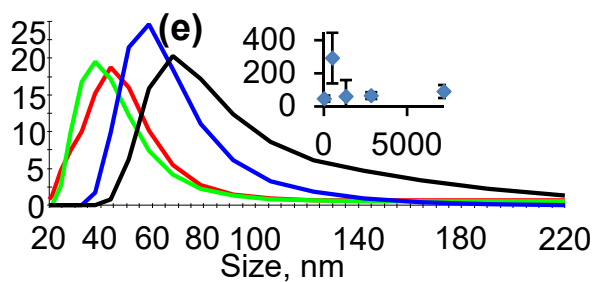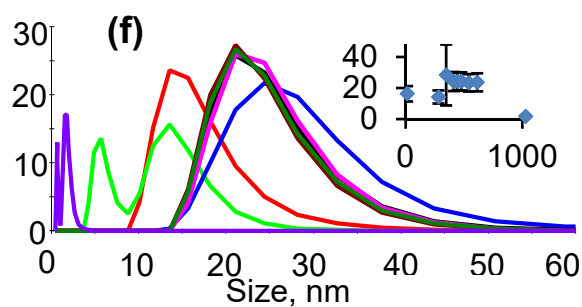

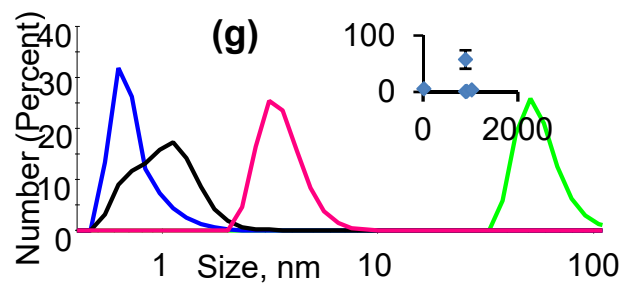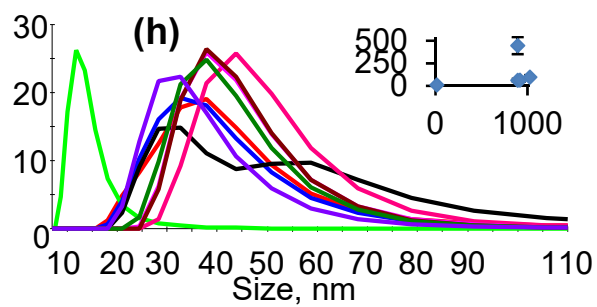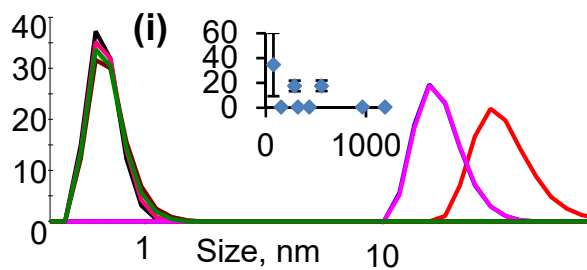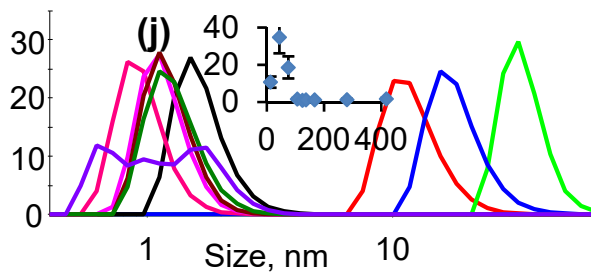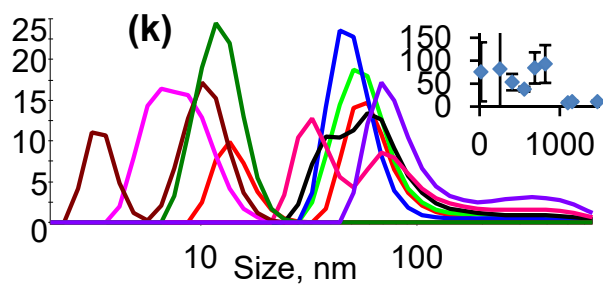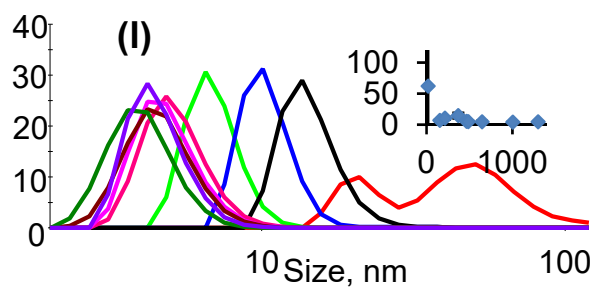

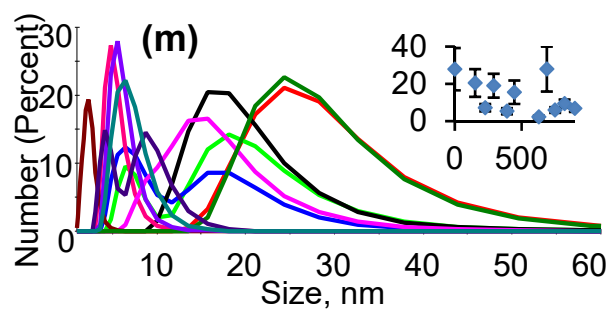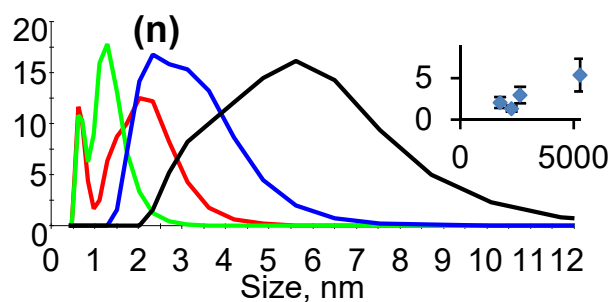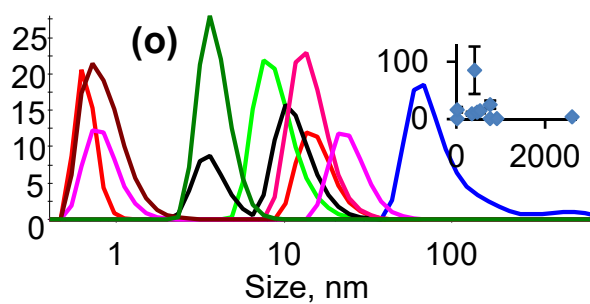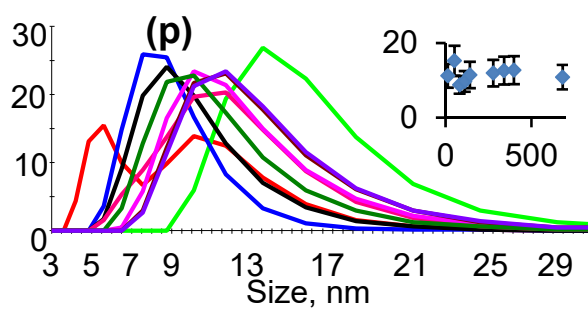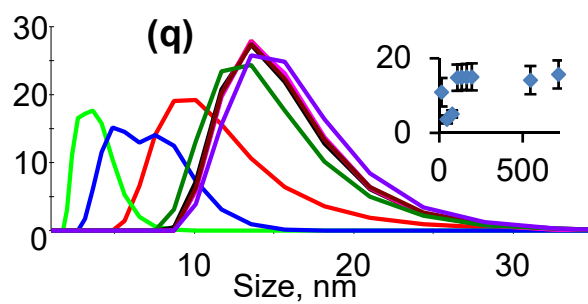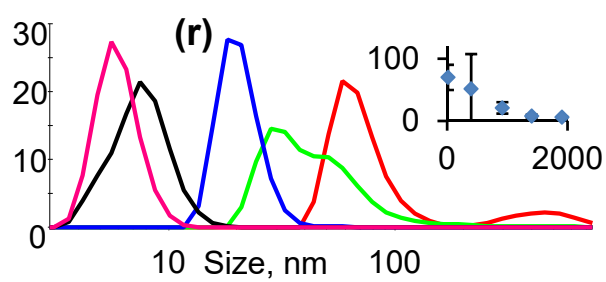

**Figure S3.** Number size distributions of gold nanoparticles synthesized at 0.1% (w/w) HAuCl<sub>4</sub> at room temperature **(a)** at 0.001 M  $\gamma$ -cyclodextrin, pH 10.56; at pH 12: **(b)** at 0.004 M  $\alpha$ -cyclodextrin; **(c)** at 0.004 M  $\beta$ -cyclodextrin; **(d)** at 0.004 M  $\gamma$ -cyclodextrin; at pH 11.5: **(e)** at 0.001 M  $\alpha$ -cyclodextrin; **(f)** at 0.002 M  $\alpha$ -cyclodextrin; **(g)** at 0.002 M  $\alpha$ -cyclodextrin in the absence of HCl; **(h)** at 0.002 M  $\alpha$ -cyclodextrin in the presence of NaCl; **(i)** at 0.004 M  $\alpha$ -cyclodextrin; **(j)** at 0.004 M  $\beta$ -cyclodextrin; **(k)** at 0.001 M  $\gamma$ -cyclodextrin; **(l)** at 0.002 M  $\gamma$ -cyclodextrin; **(m)** at 0.004 M  $\gamma$ -cyclodextrin; at pH 11: **(n)** at 0.001 M  $\alpha$ -cyclodextrin; **(o)** at 0.002 M  $\alpha$ -cyclodextrin; **(p)** at 0.004 M  $\alpha$ -cyclodextrin; **(q)** at 0.004 M  $\beta$ -cyclodextrin; **(r)** at 0.002 M  $\gamma$ -cyclodextrin. The data were acquired in back-scattering mode. The insets show the dependence of the main number size distribution peak (nm) on reaction time (min). Samples containing only aggregates were omitted from the main plots but not from the insets.

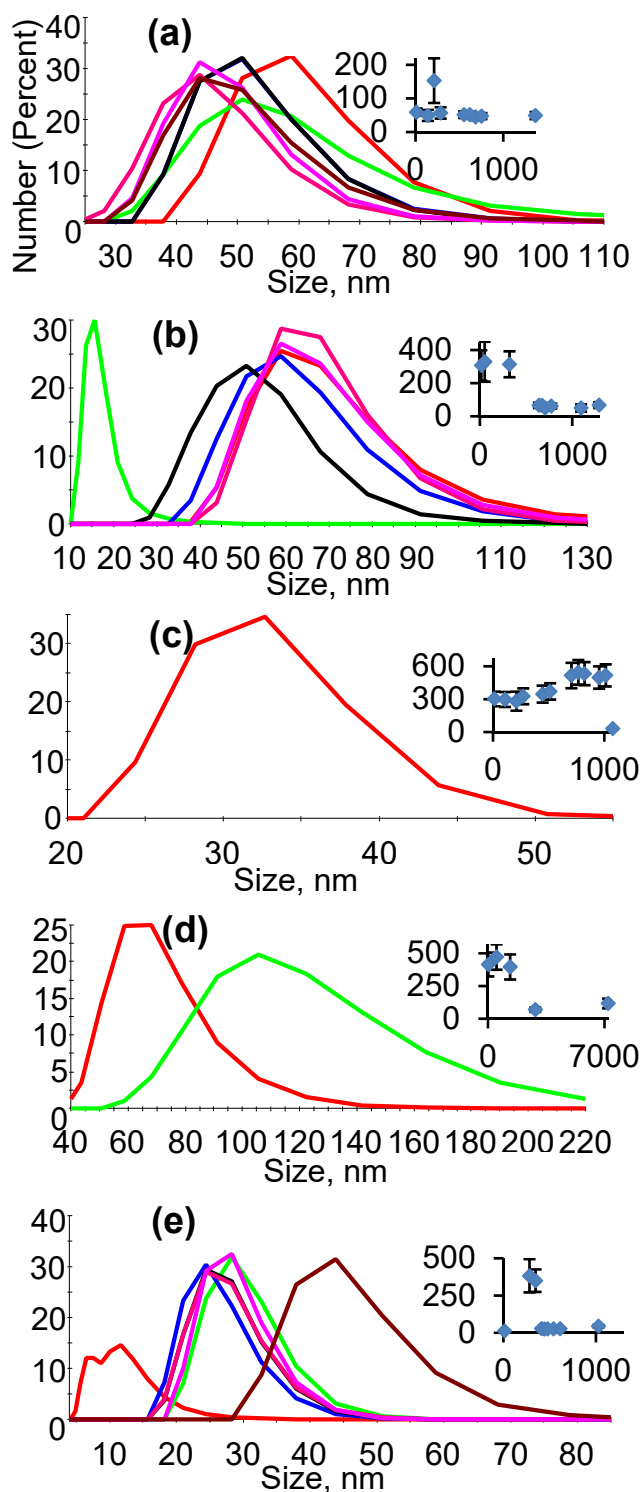



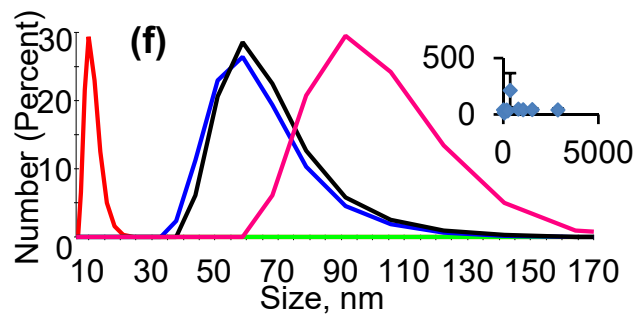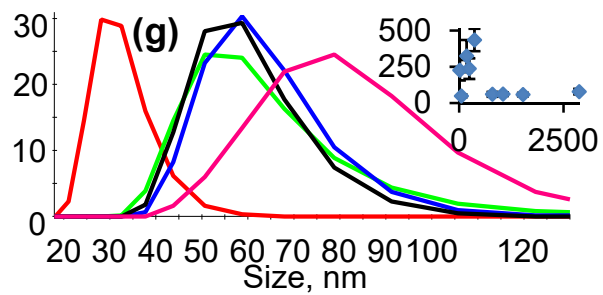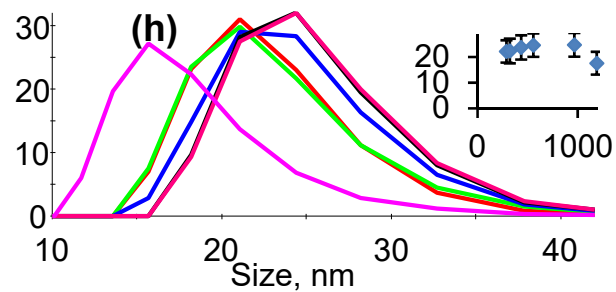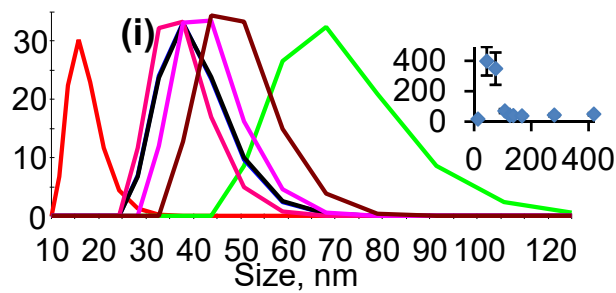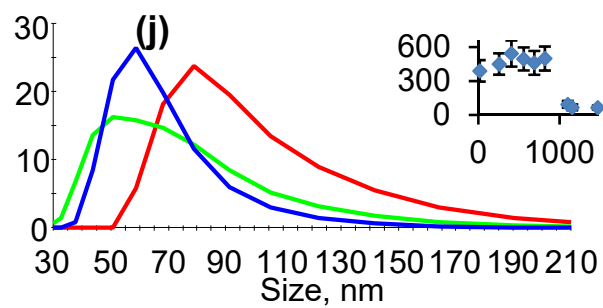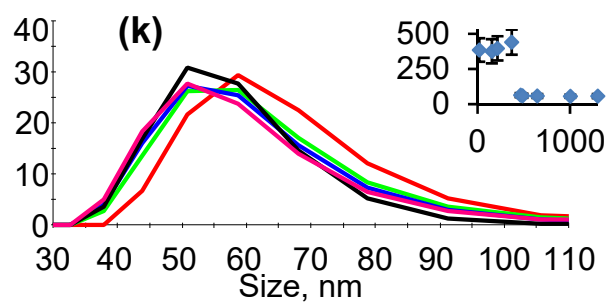

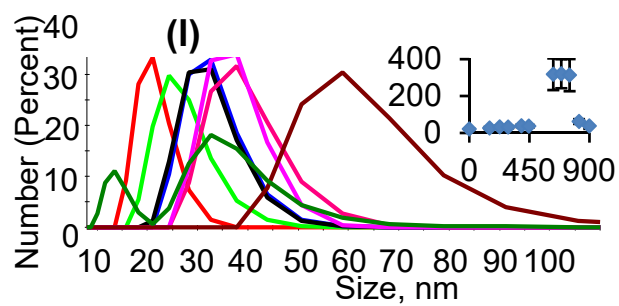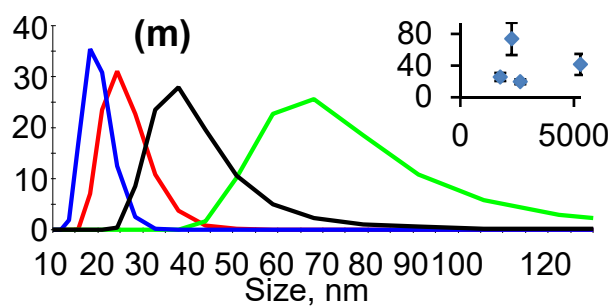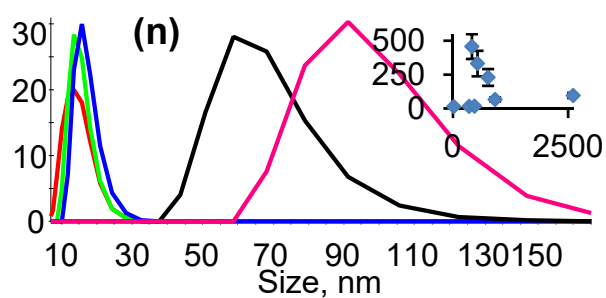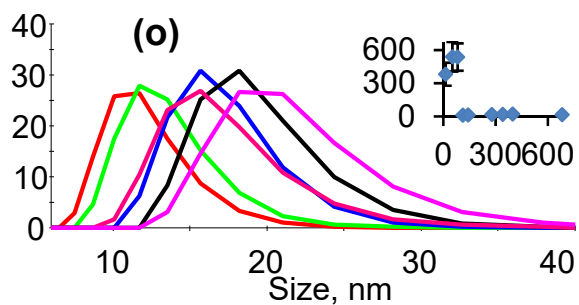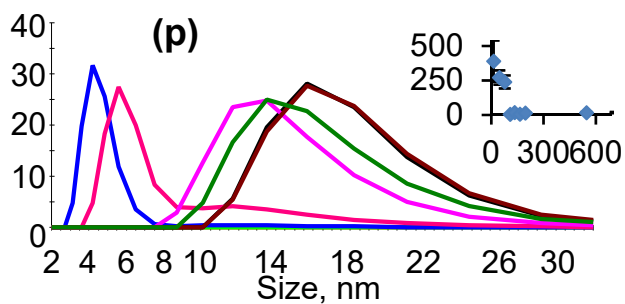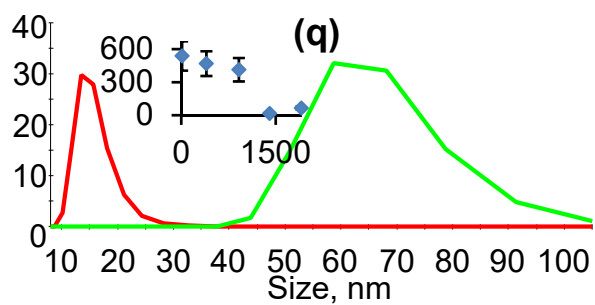

**Figure S4.** Number size distributions of gold nanoparticles synthesized at 0.1% (w/w)  $\text{HAuCl}_4$  at room temperature at pH 12: **(a)** at 0.004 M  $\alpha$ -cyclodextrin; **(b)** at 0.004 M  $\beta$ -cyclodextrin; **(c)** at 0.004 M  $\gamma$ -cyclodextrin; at pH 11.5: **(d)** at 0.001 M  $\alpha$ -cyclodextrin; **(e)** at 0.002 M  $\alpha$ -cyclodextrin; **(f)** at 0.002 M  $\alpha$ -cyclodextrin in the absence of HCl; **(g)** at 0.002 M  $\alpha$ -cyclodextrin in the presence of NaCl; **(h)** at 0.004 M  $\alpha$ -cyclodextrin; **(i)** at 0.004 M  $\beta$ -cyclodextrin; **(j)** at 0.001 M  $\gamma$ -cyclodextrin; **(k)** at 0.002 M  $\gamma$ -cyclodextrin; **(l)** at 0.004 M  $\gamma$ -cyclodextrin; at pH 11: **(m)** at 0.001 M  $\alpha$ -cyclodextrin; **(n)** at 0.002 M  $\alpha$ -cyclodextrin; **(o)** at 0.004 M  $\alpha$ -cyclodextrin; **(p)** at 0.004 M  $\beta$ -cyclodextrin; **(q)** at 0.002 M  $\gamma$ -cyclodextrin. The data were acquired in forward-scattering mode. The insets show the dependence of the main number size distribution peak (nm) on reaction time (min). Samples containing only aggregates were omitted from the main plots but not from the insets.

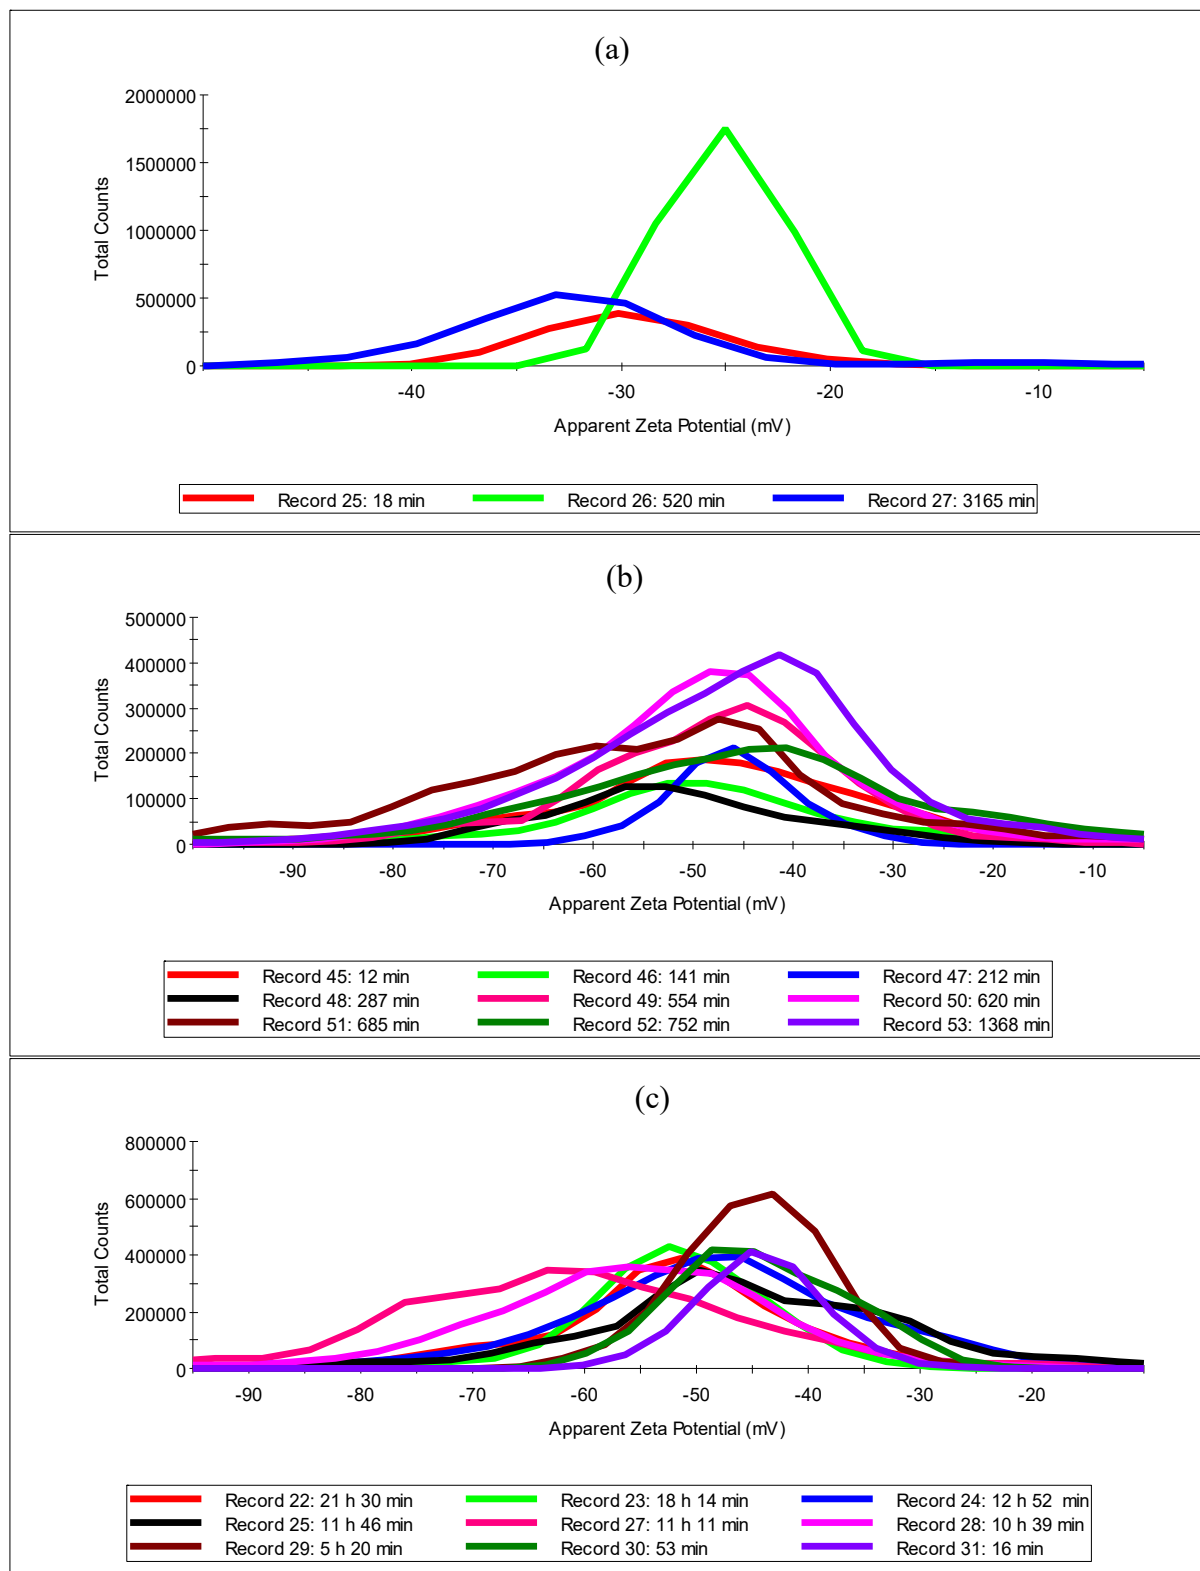

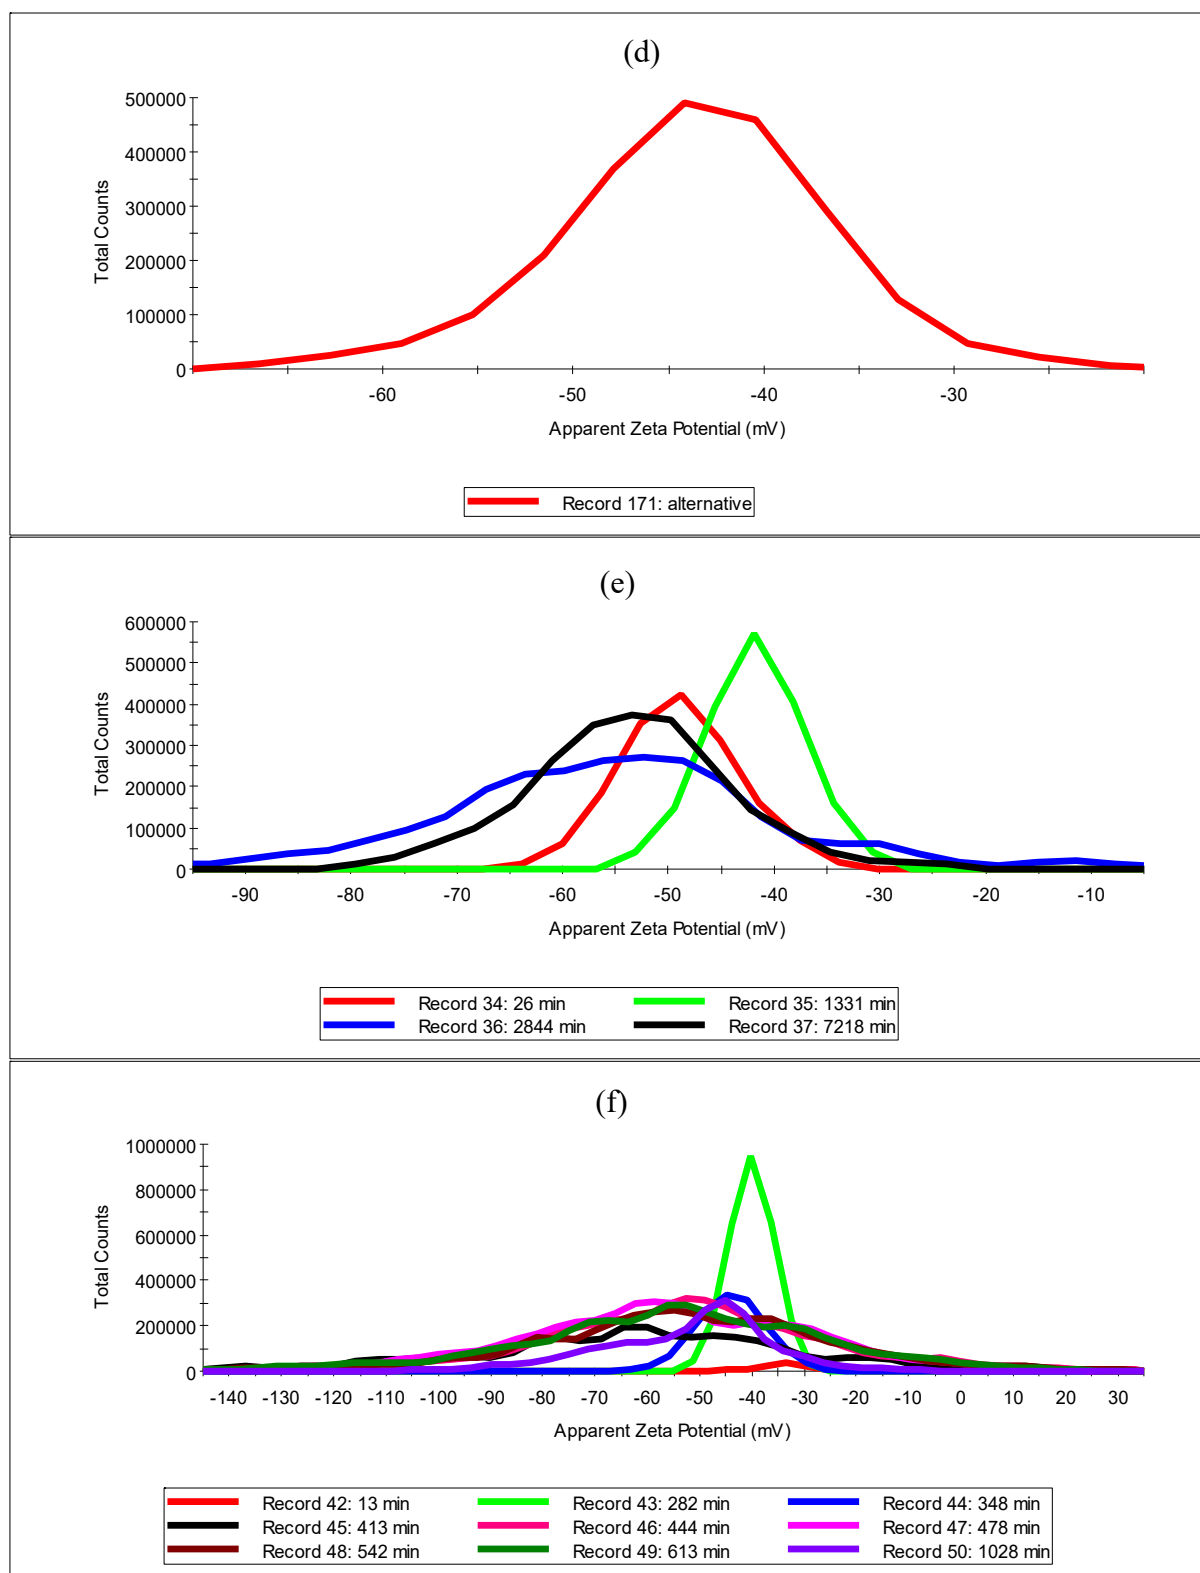

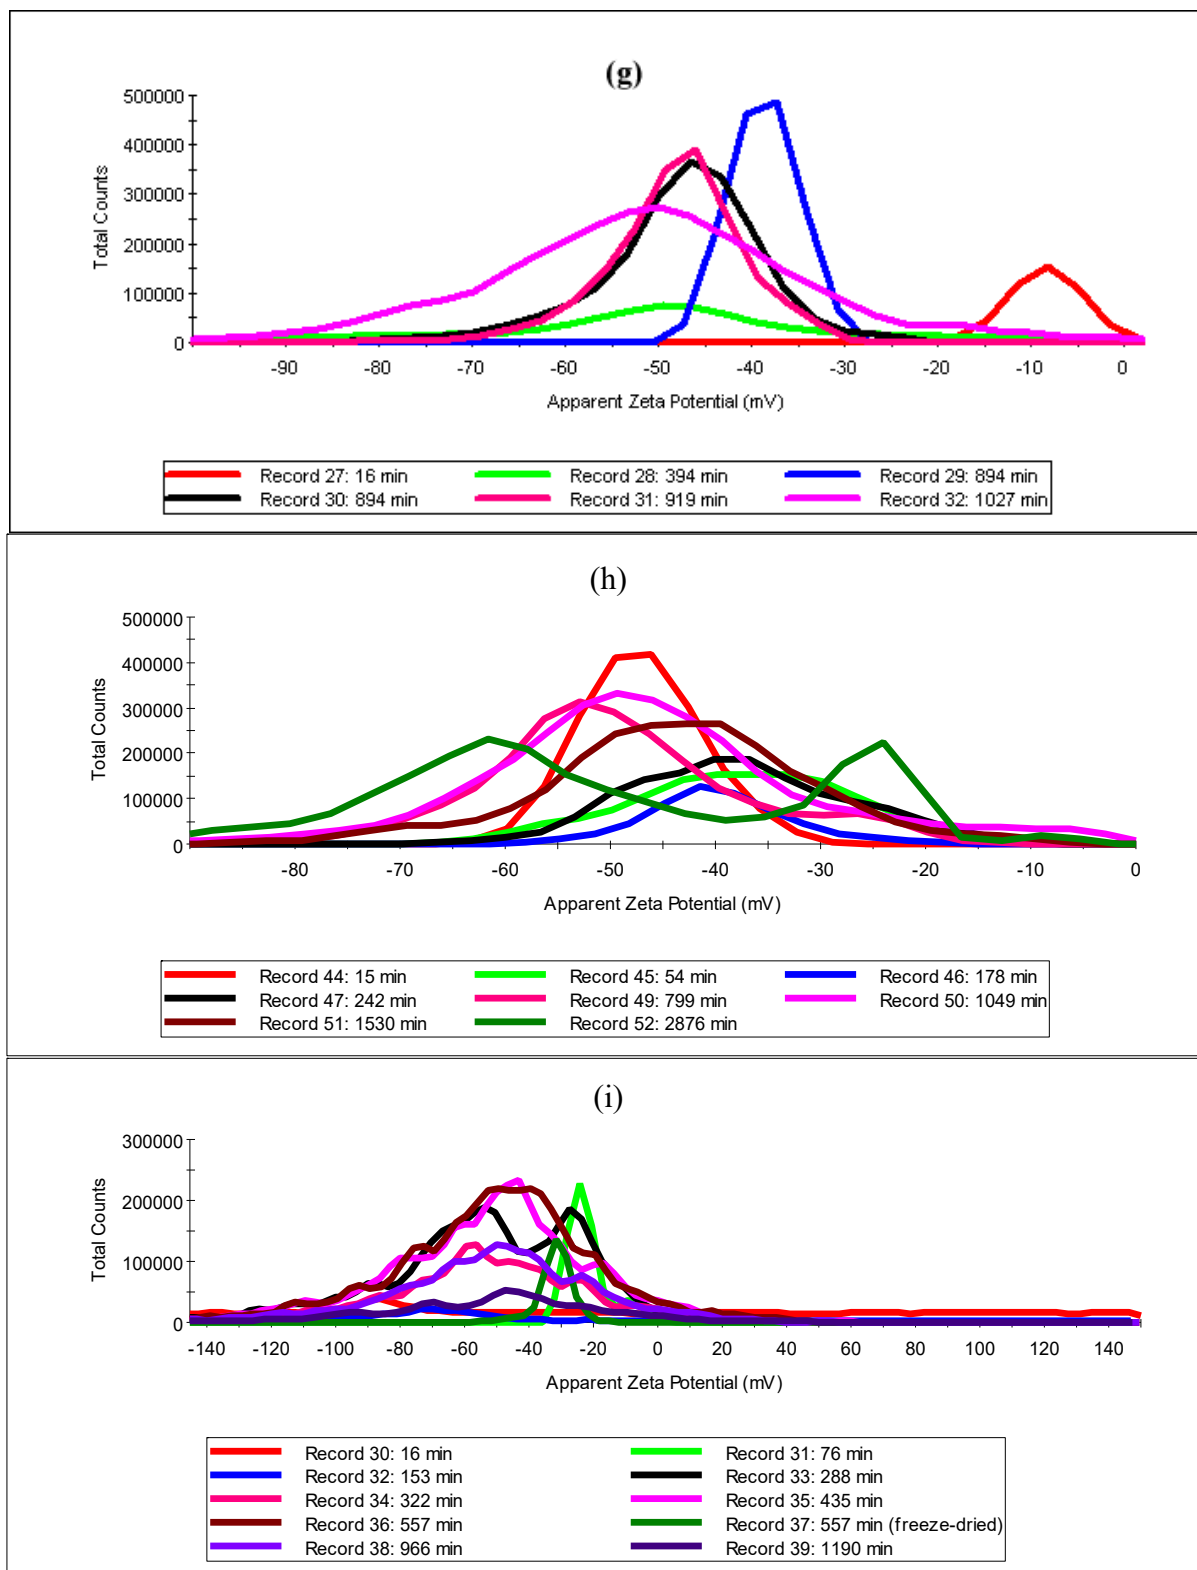

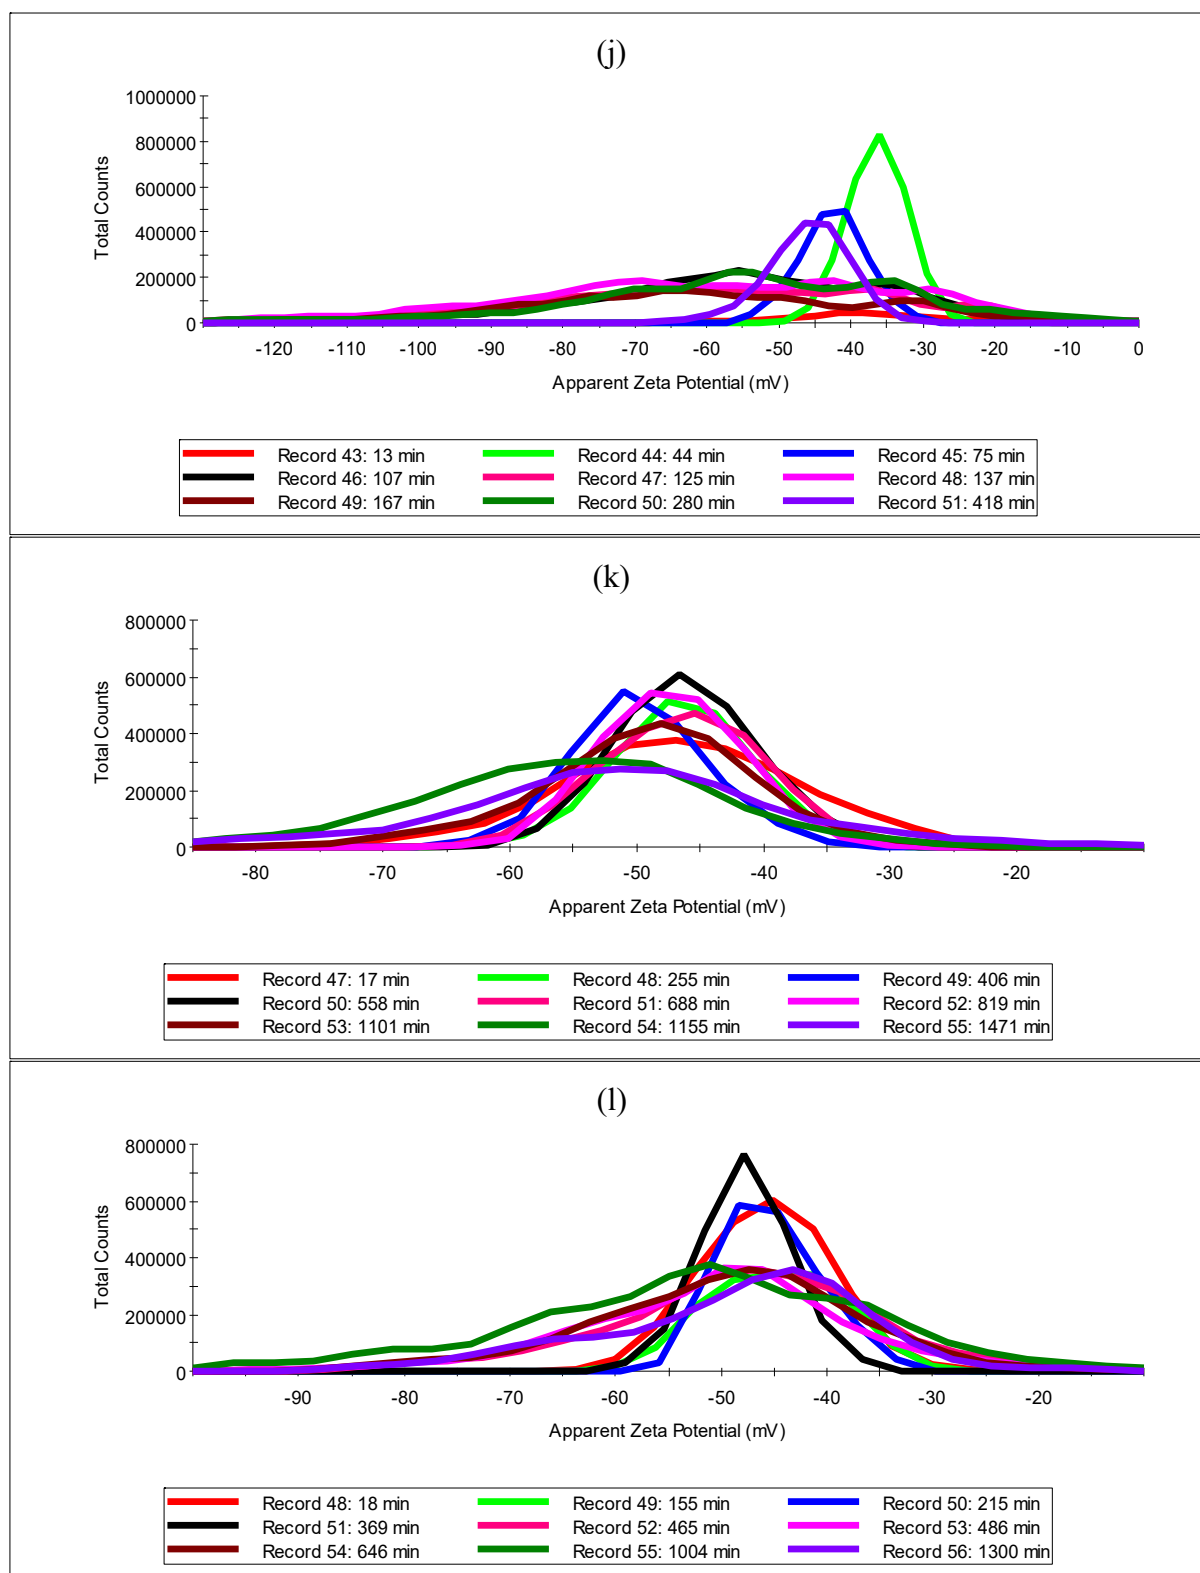

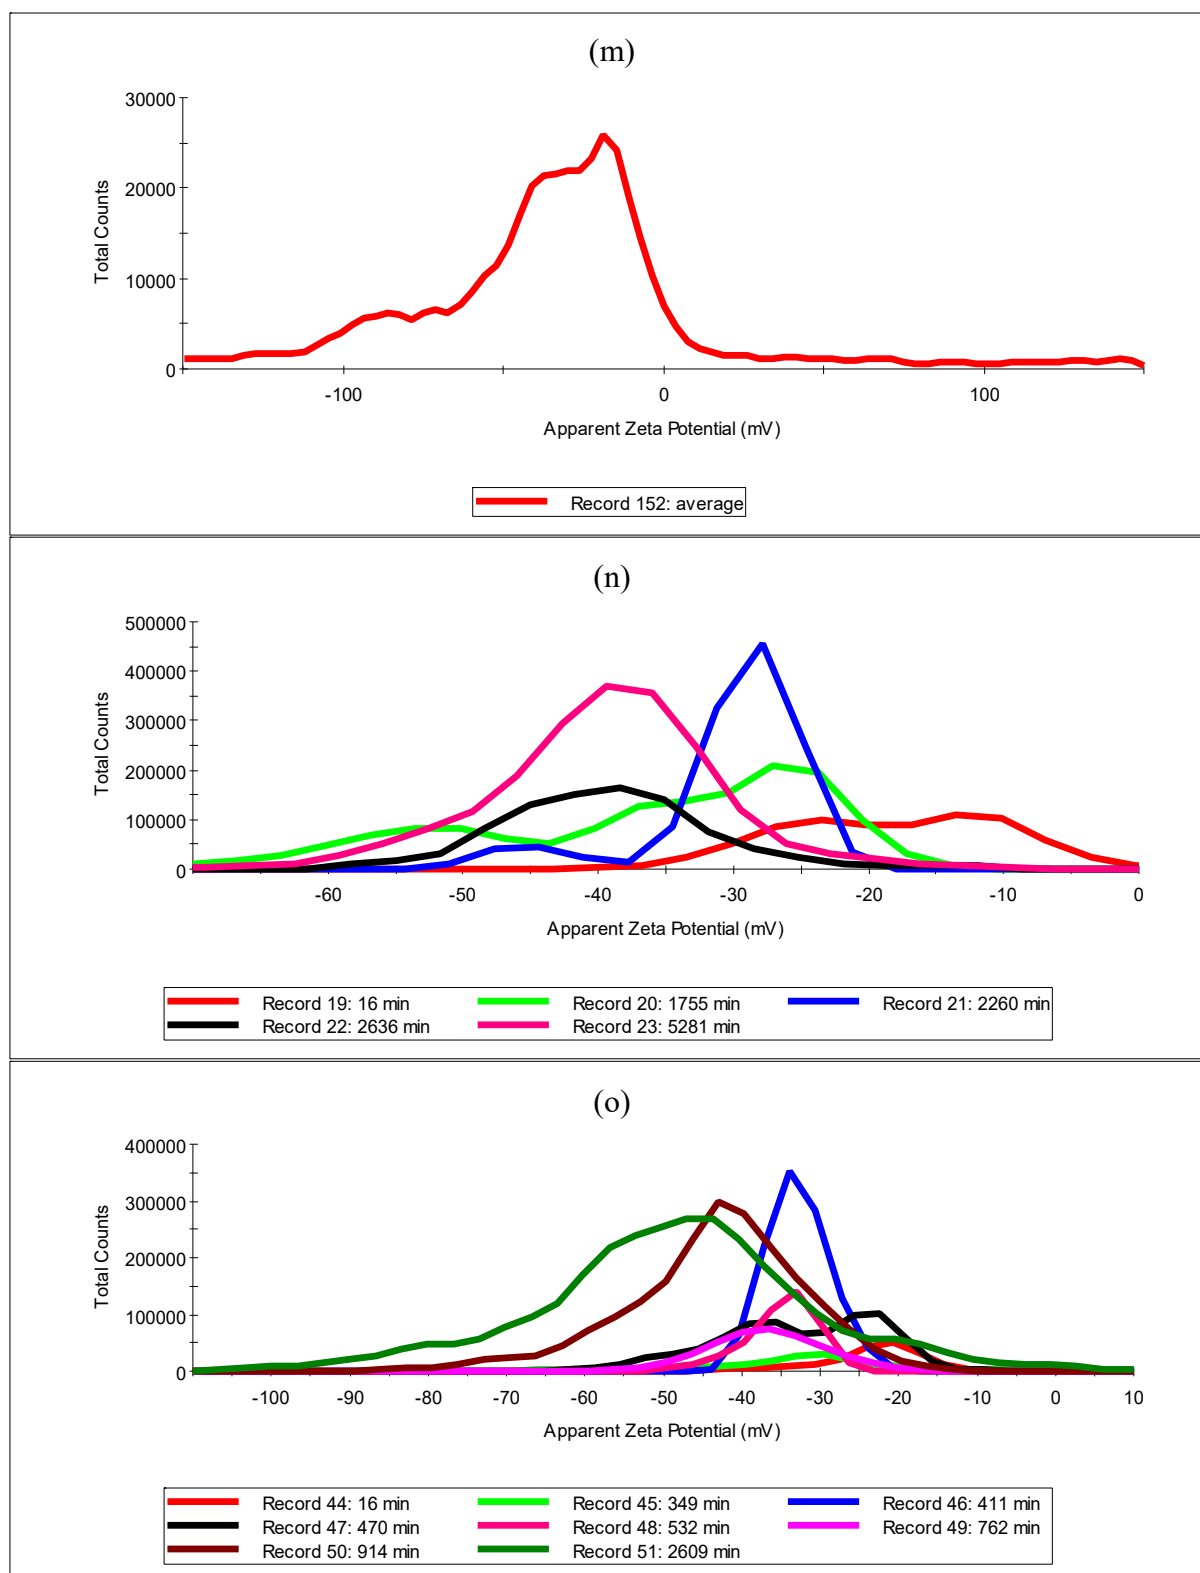

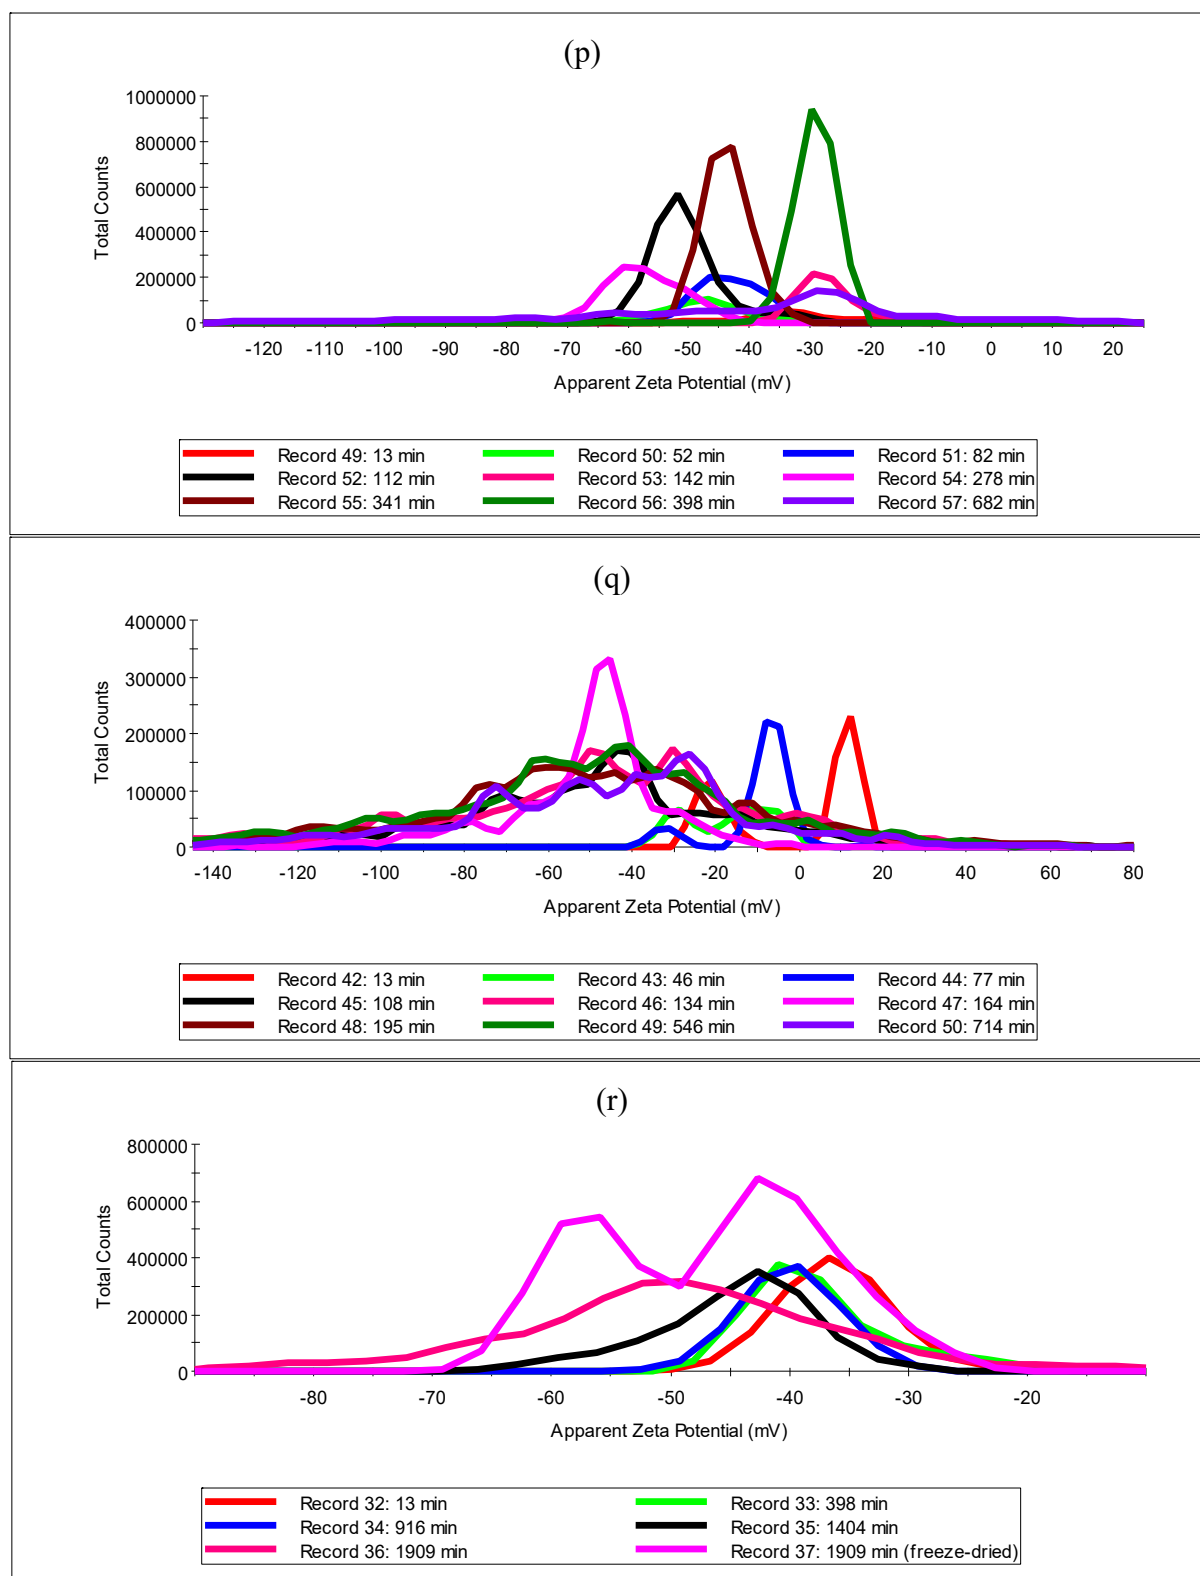

**Figure S5.** Zeta potential distributions of gold nanoparticles synthesized at 0.1% (w/w)  $\text{HAuCl}_4$  at room temperature **(a)** at 0.001 M  $\gamma$ -cyclodextrin, pH 10.56; at pH 12: **(b)** at 0.004 M  $\alpha$ -cyclodextrin; **(c)** at 0.004 M  $\beta$ -cyclodextrin; **(d)** at 0.004 M  $\gamma$ -cyclodextrin after 18.5 h; at pH 11.5: **(e)** at 0.001 M  $\alpha$ -cyclodextrin; **(f)** at 0.002 M  $\alpha$ -cyclodextrin; **(g)** at 0.002 M  $\alpha$ -cyclodextrin in the absence of HCl; **(h)** at 0.002 M  $\alpha$ -cyclodextrin in the presence of NaCl; **(i)** at 0.004 M  $\alpha$ -cyclodextrin; **(j)** at 0.004 M  $\beta$ -cyclodextrin; **(k)** at 0.001 M  $\gamma$ -cyclodextrin; **(l)** at 0.002 M  $\gamma$ -cyclodextrin; **(m)** at 0.004 M  $\gamma$ -cyclodextrin after 16 h; at pH 11: **(n)** at 0.001 M  $\alpha$ -cyclodextrin; **(o)** at 0.002 M  $\alpha$ -cyclodextrin; **(p)** at 0.004 M  $\alpha$ -cyclodextrin; **(q)** at 0.004 M  $\beta$ -cyclodextrin; **(r)** at 0.002 M  $\gamma$ -cyclodextrin. Samples containing only aggregates were omitted for clarity.



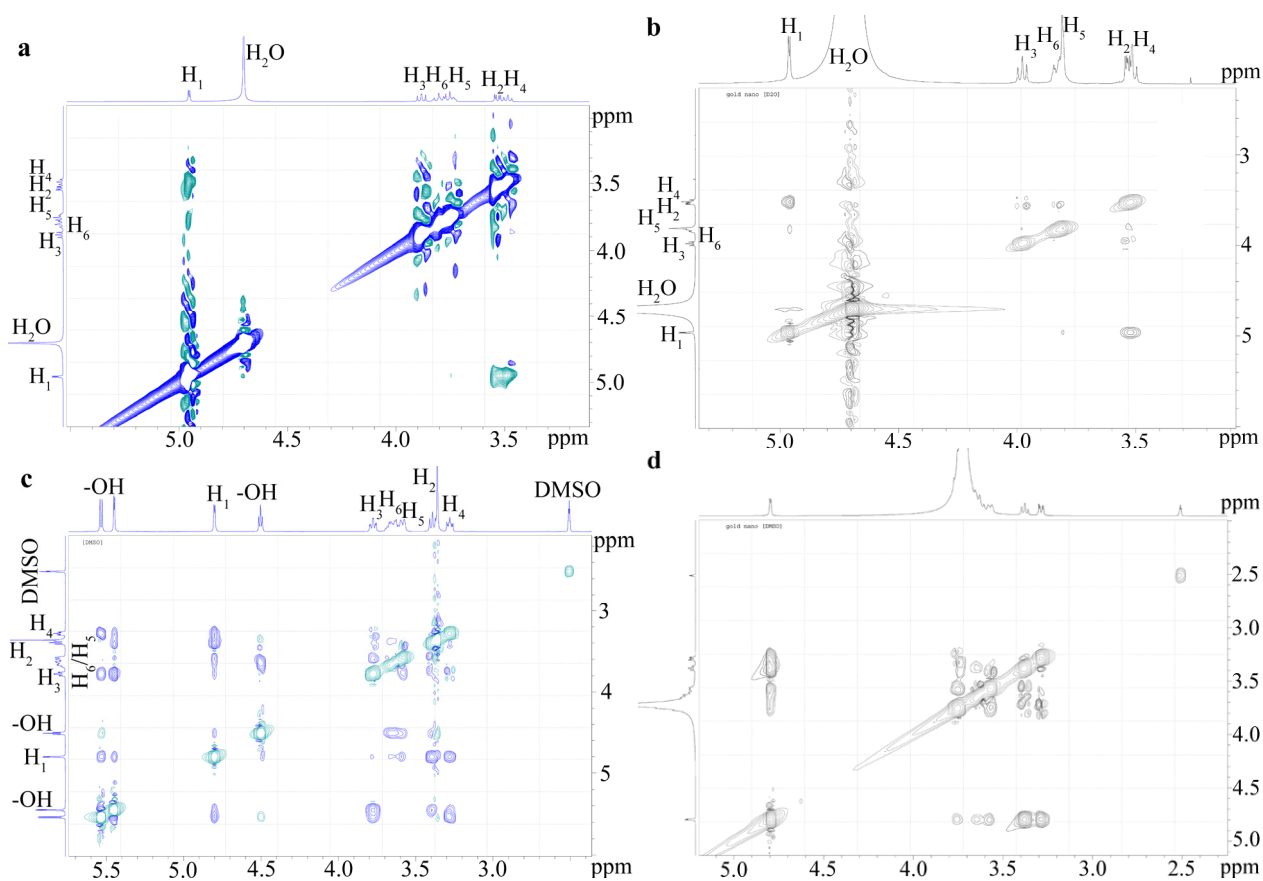

**Figure S6.** ROESY spectra of  $\alpha$ -cyclodextrin alone (a,c) and in the presence of  $\text{H[AuCl}_4\text{]}$  at pH 6.16 (b,d) in  $\text{D}_2\text{O}$  (a,b) and in DMSO (c,d).
